# Supplementary material for: Changes in use of types of tobacco products by pack sizes and price segments, prices paid and consumption following the introduction of plain packaging in Australia
Source: PubMed Central journal article supplement — Tob Control. 2015 Apr;24(Suppl 2):ii66–75. doi: 10.1136/tobaccocontrol-2014-052071 (PMC4401343; doi:10.1136/tobaccocontrol-2014-052071), 2015-04
Supplement: tobaccocontrol-2014-052071-s1.pdf [file tobaccocontrol-2014-052071-s1.pdf]

Online Table 1 Factory made cigarette (FMC) and roll-your own (RYO) tobacco brands by market segment and manufacturer, available from April 2012 to March 2014

| Premium FMC                                                                                                                                                                                                                                                                                      | Mainstream FMC                                                                                                            | Value FMC                                                                                                                                                                                                | RYO tobacco                                                                                                                                                                                                                                                                                                                                                                                                 |
|--------------------------------------------------------------------------------------------------------------------------------------------------------------------------------------------------------------------------------------------------------------------------------------------------|---------------------------------------------------------------------------------------------------------------------------|----------------------------------------------------------------------------------------------------------------------------------------------------------------------------------------------------------|-------------------------------------------------------------------------------------------------------------------------------------------------------------------------------------------------------------------------------------------------------------------------------------------------------------------------------------------------------------------------------------------------------------|
| <b>British American Tobacco Australia</b>                                                                                                                                                                                                                                                        |                                                                                                                           |                                                                                                                                                                                                          |                                                                                                                                                                                                                                                                                                                                                                                                             |
| <ul style="list-style-type: none"> <li>• Bensons &amp; Hedges: 20s; 25s</li> <li>• Cambridge: 35s; 30s</li> <li>• Craven A: 25s</li> <li>• Dunhill: 20s; 25s</li> <li>• Kent: 20s</li> <li>• Kool: 20s</li> <li>• Rothmans: 20s; 25s</li> <li>• Vogue: 20s</li> <li>• Wills: 35s; 30s</li> </ul> | <ul style="list-style-type: none"> <li>• Winfield: 20s; 25s</li> </ul>                                                    | <ul style="list-style-type: none"> <li>• Holiday: 20s; 22s; 25s; 30s; 40s; 50s</li> <li>• Just Smokes: 22s; 25s; 30s</li> <li>• Pall Mall: 20s; 23s; 25s; 30s; 40s</li> <li>• Stradbroke: 40s</li> </ul> | <ul style="list-style-type: none"> <li>• Capstan: 40g; 30g; 50g</li> <li>• Port Royal: 30g; 50g</li> <li>• Winfield: 30g; 50g</li> </ul>                                                                                                                                                                                                                                                                    |
| <b>Imperial Tobacco</b>                                                                                                                                                                                                                                                                          |                                                                                                                           |                                                                                                                                                                                                          |                                                                                                                                                                                                                                                                                                                                                                                                             |
| <ul style="list-style-type: none"> <li>• Camel: 20s; 25s</li> <li>• Davidoff: 20s</li> <li>• More: 20s</li> <li>• Peter Stuyvesant: 20s; 25s; 26s</li> </ul>                                                                                                                                     | <ul style="list-style-type: none"> <li>• Escort: 20s; 21s; 25s; 26s; 35s</li> </ul>                                       | <ul style="list-style-type: none"> <li>• Brandon: 40s</li> <li>• Horizon: 20s; 21s; 30s; 40s; 50s</li> <li>• JPS: 20s; 23s; 25s; 26s; 40s</li> <li>• Red Fortune Bamboo: 20s</li> </ul>                  | <ul style="list-style-type: none"> <li>• Bank: 50g</li> <li>• Champion: 25g; 30g; 40g; 50g</li> <li>• Dr Pat: 50g</li> <li>• Drum: 30g; 50g</li> <li>• Escort: 50g</li> <li>• Golden Virginia: 25g; 40g; 30g</li> <li>• Horizon: 30g; 50g; 25g</li> <li>• JPS: 30g; 25g</li> <li>• Log Cabin: 50g</li> <li>• Peter Stuyvesant: 30g</li> <li>• Stockman's: 50g</li> <li>• White Ox: 30g; 50g; 25g</li> </ul> |
| <b>Philip Morris Ltd</b>                                                                                                                                                                                                                                                                         |                                                                                                                           |                                                                                                                                                                                                          |                                                                                                                                                                                                                                                                                                                                                                                                             |
| <ul style="list-style-type: none"> <li>• Alpine: 25s</li> <li>• Marlboro: 20s; 25s</li> </ul>                                                                                                                                                                                                    | <ul style="list-style-type: none"> <li>• Longbeach: 20s; 25s; 30s; 40s</li> <li>• Peter Jackson: 20s; 25s; 30s</li> </ul> | <ul style="list-style-type: none"> <li>• Bond Street: 20s; 26s (introduced early 2012)</li> <li>• Choice: 20s; 25s; 40s</li> <li>• GT: 40s</li> </ul>                                                    | <ul style="list-style-type: none"> <li>• Bond Street: 30g</li> <li>• Choice: 25g; 50g</li> <li>• Longbeach: 30g; 50g; 55g</li> <li>• Marlboro: 30g; 50g</li> </ul>                                                                                                                                                                                                                                          |
| <b>ATA International Pty Ltd</b>                                                                                                                                                                                                                                                                 |                                                                                                                           |                                                                                                                                                                                                          |                                                                                                                                                                                                                                                                                                                                                                                                             |
|                                                                                                                                                                                                                                                                                                  |                                                                                                                           | <ul style="list-style-type: none"> <li>• Furongwang: 20s</li> <li>• Lesser Panda: 20s</li> <li>• Yuxi: 20s</li> </ul>                                                                                    |                                                                                                                                                                                                                                                                                                                                                                                                             |
| <b>Brightcity International Trading Pty Ltd</b>                                                                                                                                                                                                                                                  |                                                                                                                           |                                                                                                                                                                                                          |                                                                                                                                                                                                                                                                                                                                                                                                             |
|                                                                                                                                                                                                                                                                                                  |                                                                                                                           | <ul style="list-style-type: none"> <li>• Huanghelou: 20s</li> </ul>                                                                                                                                      |                                                                                                                                                                                                                                                                                                                                                                                                             |
| <b>Everbright International Trading Co Pty Ltd</b>                                                                                                                                                                                                                                               |                                                                                                                           |                                                                                                                                                                                                          |                                                                                                                                                                                                                                                                                                                                                                                                             |
|                                                                                                                                                                                                                                                                                                  |                                                                                                                           | <ul style="list-style-type: none"> <li>• Shuangxi: 20s</li> </ul>                                                                                                                                        |                                                                                                                                                                                                                                                                                                                                                                                                             |
| <b>Jamreen Pty Ltd</b>                                                                                                                                                                                                                                                                           |                                                                                                                           |                                                                                                                                                                                                          |                                                                                                                                                                                                                                                                                                                                                                                                             |
|                                                                                                                                                                                                                                                                                                  |                                                                                                                           | <ul style="list-style-type: none"> <li>• Smokers Leaf: 20s</li> </ul>                                                                                                                                    | <ul style="list-style-type: none"> <li>• Smokers Leaf: 30g; 50g</li> </ul>                                                                                                                                                                                                                                                                                                                                  |
| <b>Patron Group</b>                                                                                                                                                                                                                                                                              |                                                                                                                           |                                                                                                                                                                                                          |                                                                                                                                                                                                                                                                                                                                                                                                             |
| <ul style="list-style-type: none"> <li>• Panda: 20s</li> </ul>                                                                                                                                                                                                                                   |                                                                                                                           | <ul style="list-style-type: none"> <li>• Chunghwa: 20s</li> <li>• GD: 20s</li> </ul>                                                                                                                     |                                                                                                                                                                                                                                                                                                                                                                                                             |
| <b>PT Korea Pty Ltd</b>                                                                                                                                                                                                                                                                          |                                                                                                                           |                                                                                                                                                                                                          |                                                                                                                                                                                                                                                                                                                                                                                                             |

| Premium FMC                                                                                   | Mainstream FMC                                                                             | Value FMC                                                                                                                                                     | RYO tobacco                                                                                                                                            |
|-----------------------------------------------------------------------------------------------|--------------------------------------------------------------------------------------------|---------------------------------------------------------------------------------------------------------------------------------------------------------------|--------------------------------------------------------------------------------------------------------------------------------------------------------|
|                                                                                               |                                                                                            | <ul style="list-style-type: none"> <li>• Bohem: 20s</li> <li>• Carnival: 20s</li> <li>• Esse: 20s</li> <li>• Raison: 20s</li> <li>• This Plus: 20s</li> </ul> |                                                                                                                                                        |
| <b><i>Richland Express</i></b>                                                                |                                                                                            |                                                                                                                                                               |                                                                                                                                                        |
|                                                                                               | <ul style="list-style-type: none"> <li>• Manitou: 20s</li> </ul>                           | <ul style="list-style-type: none"> <li>• Ashford: 20s; 25s</li> <li>• Easy: 20s; 30s</li> <li>• Gala Super Slims: 20s</li> <li>• Reef: 20s</li> </ul>         | <ul style="list-style-type: none"> <li>• Harvest: 25g</li> <li>• Manitou: 35g</li> </ul>                                                               |
| <b><i>Scandinavian Tobacco Group Australia Pty Ltd</i></b>                                    |                                                                                            |                                                                                                                                                               |                                                                                                                                                        |
| <ul style="list-style-type: none"> <li>• Djarum: 20s</li> </ul>                               | <ul style="list-style-type: none"> <li>• Smokin Joes: 20s</li> </ul>                       |                                                                                                                                                               | <ul style="list-style-type: none"> <li>• Colts: 25g</li> </ul>                                                                                         |
| <b><i>Smokers Supplies</i></b>                                                                |                                                                                            |                                                                                                                                                               |                                                                                                                                                        |
| <ul style="list-style-type: none"> <li>• Soex Herbal Flavoured Beedis: 20s</li> </ul>         |                                                                                            | <ul style="list-style-type: none"> <li>• Honeyrose: 20s</li> </ul>                                                                                            | <ul style="list-style-type: none"> <li>• Honeyrose Herbal: 50g</li> <li>• Natural American Spirit: 40g</li> <li>• Soex Herbal Molasses: 50g</li> </ul> |
| <b><i>Trojan Trading Company</i></b>                                                          |                                                                                            |                                                                                                                                                               |                                                                                                                                                        |
| <ul style="list-style-type: none"> <li>• Nat Sherman: 20s</li> <li>• Sobraine: 20s</li> </ul> | <ul style="list-style-type: none"> <li>• Black Devil: 20s</li> <li>• Vibes: 20s</li> </ul> |                                                                                                                                                               | <ul style="list-style-type: none"> <li>• Domingo: 25g; 40g</li> <li>• Orlando: 25g; 40g</li> </ul>                                                     |
| <b><i>ATA International Pty Ltd; PT Korea Pty Ltd</i></b>                                     |                                                                                            |                                                                                                                                                               |                                                                                                                                                        |
|                                                                                               |                                                                                            | <ul style="list-style-type: none"> <li>• Double Happiness: 20s</li> </ul>                                                                                     |                                                                                                                                                        |
| <b><i>Cabrino Pty Ltd; Smokers Supplies</i></b>                                               |                                                                                            |                                                                                                                                                               |                                                                                                                                                        |
| <ul style="list-style-type: none"> <li>• Gudang Garam: 20s</li> </ul>                         |                                                                                            |                                                                                                                                                               |                                                                                                                                                        |
| <b><i>Imperial Tobacco; British American Tobacco Australia</i></b>                            |                                                                                            |                                                                                                                                                               |                                                                                                                                                        |
|                                                                                               |                                                                                            |                                                                                                                                                               | <ul style="list-style-type: none"> <li>• Holiday: 30g; 50g</li> </ul>                                                                                  |
| <b><i>Stuart Alexander &amp; Co Pty Ltd; Smokers Supplies</i></b>                             |                                                                                            |                                                                                                                                                               |                                                                                                                                                        |
|                                                                                               |                                                                                            |                                                                                                                                                               | <ul style="list-style-type: none"> <li>• Old Holborn: 30g; 50g</li> </ul>                                                                              |
| <b><i>Company not listed</i></b>                                                              |                                                                                            |                                                                                                                                                               |                                                                                                                                                        |
|                                                                                               | <ul style="list-style-type: none"> <li>• Natural American Spirit: 20s</li> </ul>           | <ul style="list-style-type: none"> <li>• Classic: 20s</li> </ul>                                                                                              |                                                                                                                                                        |

Notes: Pipe tobacco not included

Recently discontinued pack sizes or brands

Recently introduced pack sizes or brands

Deal factory-made cigarettes are labelled as being sold by Richland Express but are not listed on website

#### Sources:

Brands as listed in the *Australian Retail Tobacconist* applicable for April 2012 [vol 84; no. 5], using “Local manufacturer or importer” information from Trademarks section to determine Company. Recently discontinued and introduced brands and pack sizes are those included in March 2014 [vol 90] of the publication but not in the April 2012 edition.

Richland Express brands from website <http://richlandexpress.com.au/tobacco-products.php> as at September 2014 and from August 2012 [www.richlandexpress.com.au/pdf/richland-express-price-list-aug-2012.pdf](http://www.richlandexpress.com.au/pdf/richland-express-price-list-aug-2012.pdf).

A regularly updated list is available at <http://www.tobaccoinaustralia.org.au/chapter-10-tobacco-industry/10-6-market-share-and-brand-share>
