# Supplementary material for: Changes in use of types of tobacco products by pack sizes and price segments, prices paid and consumption following the introduction of plain packaging in Australia
Source: PubMed Central journal article supplement — Tob Control. 2015 Apr;24(Suppl 2):ii66–75. doi: 10.1136/tobaccocontrol-2014-052071 (PMC4401343; doi:10.1136/tobaccocontrol-2014-052071), 2015-04
Supplement: tobaccocontrol-2014-052071-s2.pdf [file tobaccocontrol-2014-052071-s2.pdf]

Online Table 2. JPS brand, brand extensions, brand variants and pack sizes available 2011 to 2013

| Brand, brand extensions               | 2011                                                                              | 2012                                                                                 | 2013                                                                                  |
|---------------------------------------|-----------------------------------------------------------------------------------|--------------------------------------------------------------------------------------|---------------------------------------------------------------------------------------|
| Superkings/<br>JPSsuperkings<br>20s   |  |    |    |
| JPS 25s/JPS 26s                       |  |    |    |
| JPS 20s                               |                                                                                   |   |   |
| JPS 40s                               |                                                                                   |                                                                                      |  |
| JPS Nano<br>20s/23s                   |                                                                                   |  |  |
| JPS Due Gold<br>JPS Ice 20s           |                                                                                   |                                                                                      |  |
| <b>Total brand-variant-pack sizes</b> | <b>9</b>                                                                          | <b>16</b>                                                                            | <b>23</b>                                                                             |

Source: Quit Victoria pack collection, *Australian Retail Tobacconist* price lists 2011 to 2013
